# Supplementary material
Source: HighWire-hosted journal article supplement (https://bmjopen.bmj.com/content/13/2/e064305)
Supplement: inline-supplementary-material-1 [file inline-supplementary-material-1.pdf]

### Supplementary material 1: Frequencies and proportions of emergency visits according to diagnosis by age groups and year, between 2019 and 2021

Table S1.1: Frequencies and proportions of emergency visits of 15-24 years old according to diagnosis, between 2019 and 2021

|                                                                                       | 2019  |     | 2020  |     | Evolution<br>2019-2020 | 2021  |     | Evolution<br>2019-2021 |
|---------------------------------------------------------------------------------------|-------|-----|-------|-----|------------------------|-------|-----|------------------------|
|                                                                                       | Freq. | %   | Freq. | %   |                        | Freq. | %   |                        |
| Mental and behavioural disorders due to psychoactive substance use                    | 83    | 3%  | 88    | 4%  | 6%                     | 91    | 3%  | 10%                    |
| Schizophrenia, schizotypal and delusional disorders                                   | 456   | 17% | 363   | 17% | -20%                   | 395   | 13% | -13%                   |
| Mood [affective] disorders                                                            | 839   | 31% | 687   | 31% | -18%                   | 1209  | 39% | 44%                    |
| Neurotic, stress-related and somatoform disorders                                     | 528   | 20% | 502   | 23% | -5%                    | 752   | 24% | 42%                    |
| Behavioural syndromes associated with physiological disturbances and physical factors | 68    | 3%  | 51    | 2%  | -25%                   | 85    | 3%  | 25%                    |
| Disorders of adult personality and behaviour                                          | 286   | 11% | 196   | 9%  | -31%                   | 252   | 8%  | -12%                   |
| Behavioural and emotional disorders (childhood and adolescence onset)                 | 126   | 5%  | 132   | 6%  | 5%                     | 103   | 3%  | -18%                   |
| Non-psychiatric disorders                                                             | 295   | 11% | 165   | 8%  | -44%                   | 250   | 8%  | -15%                   |
| Total patients                                                                        | 2681  |     | 2184  |     |                        | 3137  |     |                        |

Table S1.2: Frequencies and proportions of emergency visits of 25-44 years old according to diagnosis, between 2019 and 2021

|                                                                                       | 2019  |     | 2020  |     | Evolution<br>2019-2020 | 2021  |     | Evolution<br>2019-2021 |
|---------------------------------------------------------------------------------------|-------|-----|-------|-----|------------------------|-------|-----|------------------------|
|                                                                                       | Freq. | %   | Freq. | %   |                        | Freq. | %   |                        |
| Mental and behavioural disorders due to psychoactive substance use                    | 267   | 6%  | 231   | 7%  | -13%                   | 277   | 7%  | 4%                     |
| Schizophrenia, schizotypal and delusional disorders                                   | 1118  | 27% | 868   | 27% | -22%                   | 959   | 24% | -14%                   |
| Mood [affective] disorders                                                            | 1304  | 31% | 1037  | 32% | -20%                   | 1335  | 34% | 2%                     |
| Neurotic, stress-related and somatoform disorders                                     | 804   | 19% | 686   | 21% | -15%                   | 883   | 22% | 10%                    |
| Behavioural syndromes associated with physiological disturbances and physical factors | 53    | 1%  | 30    | 1%  | -43%                   | 37    | 1%  | -30%                   |
| Disorders of adult personality and behaviour                                          | 242   | 6%  | 144   | 4%  | -40%                   | 131   | 3%  | -46%                   |
| Behavioural and emotional disorders (childhood and adolescence onset)                 | 27    | 1%  | 28    | 1%  | 4%                     | 38    | 1%  | 41%                    |
| Non-psychiatric disorders                                                             | 365   | 9%  | 244   | 7%  | -33%                   | 286   | 7%  | -22%                   |
| Total patients                                                                        | 4180  |     | 3268  |     |                        | 3946  |     |                        |

Table S1.3: Frequencies and proportions of emergency visits of 45-64 years old according to diagnosis, between 2019 and 2021

|                                                                                       | 2019  |     | 2020  |     | Evolution<br>2019-<br>2020 | 2021  |     | Evolution<br>2019-<br>2021 |
|---------------------------------------------------------------------------------------|-------|-----|-------|-----|----------------------------|-------|-----|----------------------------|
|                                                                                       | Freq. | %   | Freq. | %   |                            | Freq. | %   |                            |
| Mental and behavioural disorders due to psychoactive substance use                    | 154   | 8%  | 127   | 8%  | -18%                       | 98    | 5%  | -36%                       |
| Schizophrenia, schizotypal and delusional disorders                                   | 613   | 31% | 447   | 27% | -27%                       | 474   | 26% | -23%                       |
| Mood [affective] disorders                                                            | 738   | 37% | 611   | 37% | -17%                       | 684   | 38% | -7%                        |
| Neurotic, stress-related and somatoform disorders                                     | 238   | 12% | 223   | 14% | -6%                        | 294   | 16% | 24%                        |
| Behavioural syndromes associated with physiological disturbances and physical factors | 10    | 0%  | 7     | 0%  | -30%                       | 13    | 1%  | 30%                        |
| Disorders of adult personality and behaviour                                          | 65    | 3%  | 50    | 3%  | -23%                       | 35    | 2%  | -46%                       |
| Behavioural and emotional disorders (childhood and adolescence onset)                 | 11    | 1%  | 12    | 1%  | 9%                         | 9     | 0%  | -18%                       |
| Non-psychiatric disorders                                                             | 178   | 9%  | 167   | 10% | -6%                        | 204   | 11% | 15%                        |
| Total patients                                                                        | 2007  |     | 1644  |     |                            | 1811  |     |                            |

Table S1.4: Frequencies and proportions of emergency visits of 65 years old and over according to diagnosis, between 2019 and 2021

|                                                                                       | 2019  |     | 2020  |     | Evolution<br>2019-<br>2020 | 2021  |     | Evolution<br>2019-<br>2021 |
|---------------------------------------------------------------------------------------|-------|-----|-------|-----|----------------------------|-------|-----|----------------------------|
|                                                                                       | Freq. | %   | Freq. | %   |                            | Freq. | %   |                            |
| Mental and behavioural disorders due to psychoactive substance use                    | 12    | 3%  | 12    | 3%  | 0%                         | 11    | 3%  | -8%                        |
| Schizophrenia, schizotypal and delusional disorders                                   | 85    | 18% | 75    | 20% | -12%                       | 77    | 19% | -9%                        |
| Mood [affective] disorders                                                            | 249   | 54% | 198   | 53% | -20%                       | 217   | 54% | -13%                       |
| Neurotic, stress-related and somatoform disorders                                     | 66    | 14% | 54    | 14% | -18%                       | 76    | 19% | 15%                        |
| Behavioural syndromes associated with physiological disturbances and physical factors | 7     | 2%  | 4     | 1%  | -43%                       | 2     | 0%  | -71%                       |
| Disorders of adult personality and behaviour                                          | 3     | 1%  | 7     | 2%  | 133%                       | 1     | 0%  | -67%                       |
| Non-psychiatric disorders                                                             | 38    | 8%  | 27    | 7%  | -29%                       | 19    | 5%  | -50%                       |
| Total patients                                                                        | 460   |     | 377   |     |                            | 403   |     |                            |
